# Supplementary material for: Distribution of superparamagnetic Au/Fe nanoparticles in an isolated guinea pig brain with an intact blood brain barrier
Source: Royal Society of Chemistry journal article supplement (doi:10.1039/c8nr07182a), 2018-01-01
Supplement: c8nr07182a1.pdf [file c8nr07182a1.pdf]

# Supporting Information for

## Distribution of Superparamagnetic Au/Fe nanoparticles in an isolated guinea pig brain with intact blood brain barrier

*Barbara Sanavio<sup>1#</sup>, Laura Librizzi<sup>3#</sup>, Paolo Pennacchio<sup>2#</sup>, Galina V. Beznoussenko<sup>4</sup>, Fernanda Sousa<sup>1</sup>,  
Paulo Jacob Silva<sup>5</sup>, Alexandre A. Mironov<sup>4</sup>, Carolina Frassoni<sup>2</sup>, Francesco Stellacci<sup>5,6</sup>, Marco de  
Curtis<sup>3</sup>, Silke Krol<sup>1,7\*</sup>*

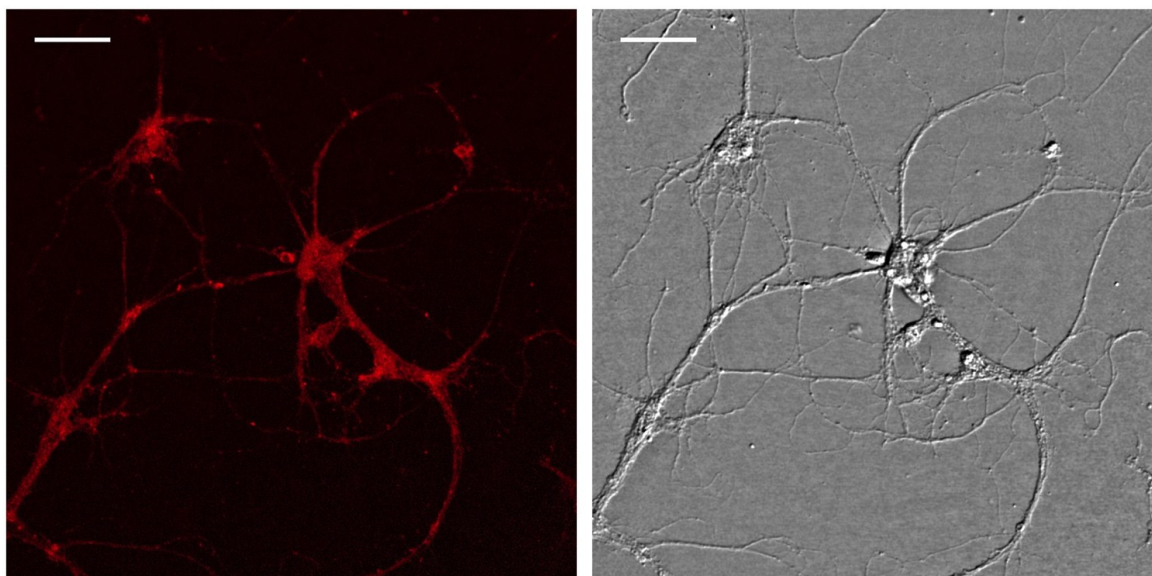

**Supplementary Figure 1.** Primary culture of Rat hippocampal neurons exposed for three hours to a 0.1mg/ml solution of NPs suspended in ACSF. Primary neuronal cultures were prepared from the hippocampi of 18-day-old fetal rats as described by Frassoni C. et al. (*Neuroscience* 131 (2005) 813–

823). Briefly, rat hippocampi were dissociated by treatment with trypsin (0.25% for 15 min at 37 °C), followed by trituration with a fire-polished Pasteur pipette. Dissociated cells were plated on poly-L-lysine-treated (SigmaAldrich) glass coverslips in MEM with 10% horse serum at densities of 20,000 cells/cm<sup>2</sup>. Neurons were then exposed for 3h to a 0.1 mg/ml solution of BODIPY-labeled NP1s and live imaged by CLSM.

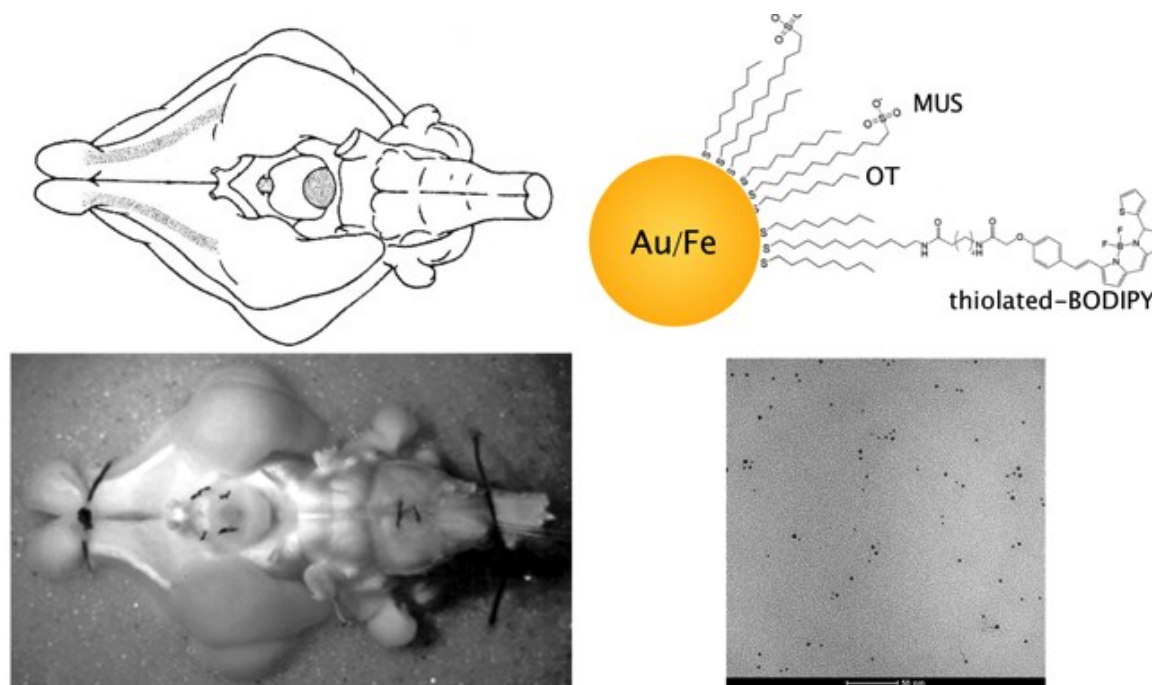

**Supplementary Figure 2.** Experimental set up of the experiments on the *in vitro* isolated guinea pig brain (A) B. Scheme of the Au/Fe MUS:OT NPs (NP1s) and their fluorescent-label functionalization. C. TEM micrograph of a sample of NP1s.

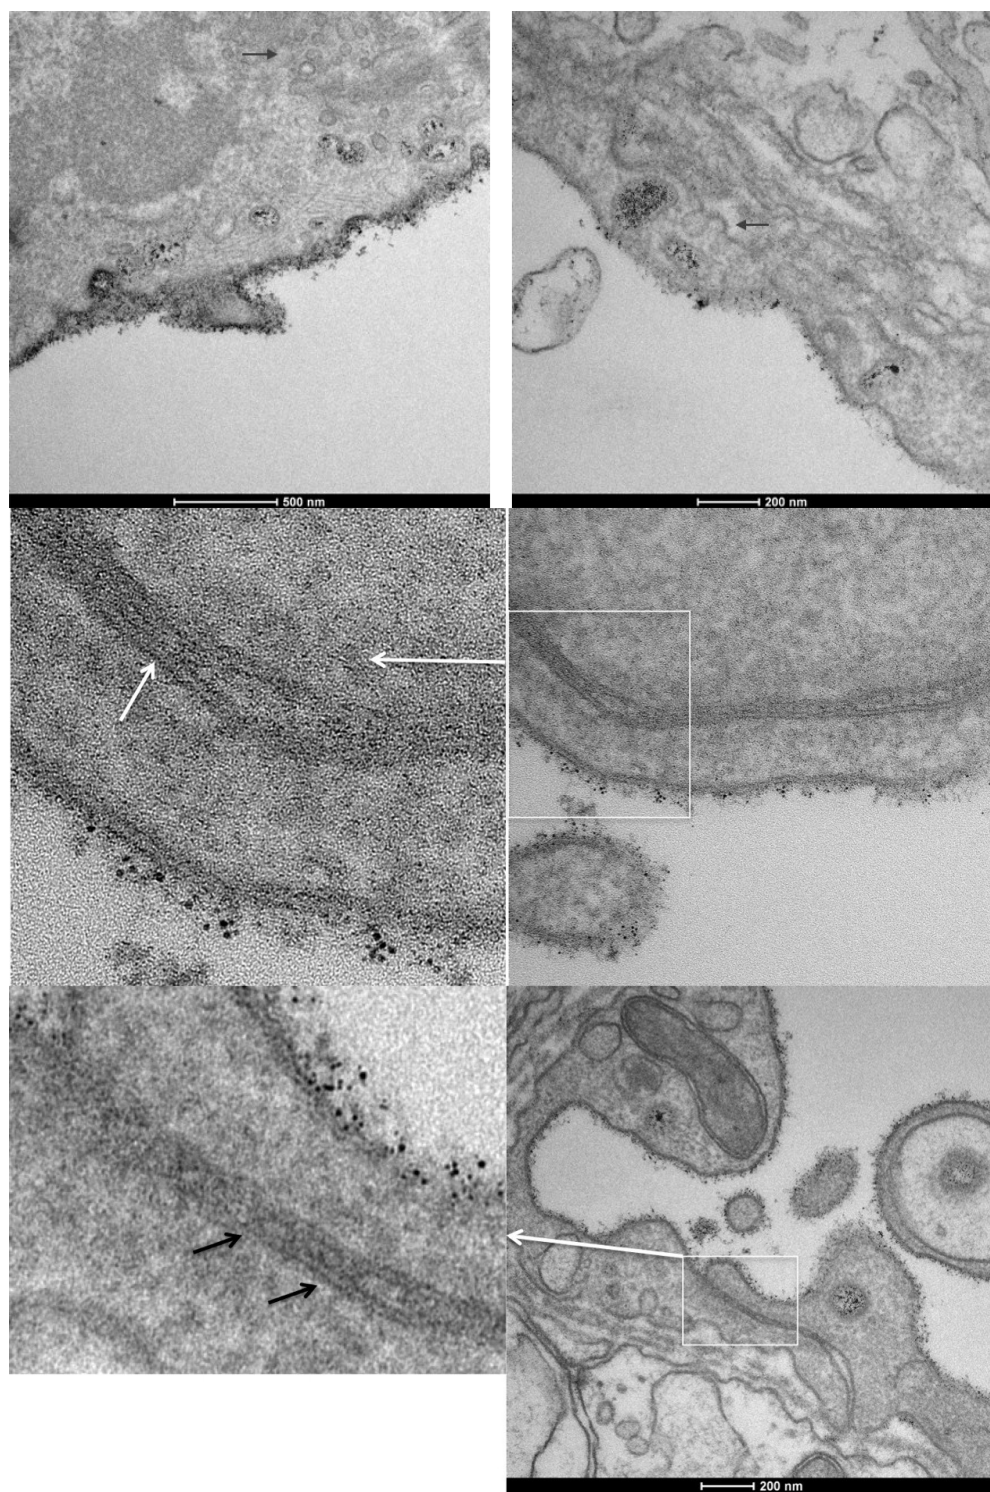

**Supplementary figure 3.** Caveolae (arrow) not involved in uptake and transcytosis process (top two panels). Bottom panels (four): NPs do not affect tight junctions.
